# Supplementary material for: Osthol Ameliorates Kidney Damage and Metabolic Syndrome Induced by a High-Fat/High-Sugar Diet
Source: Int J Mol Sci. 2021 Feb 28;22(5):2431. doi: 10.3390/ijms22052431 (PMC7957708; doi:10.3390/ijms22052431)
Supplement: Supplementary file 1 [file ijms-22-02431-s001.pdf]

## Supplementary materials

### ***Skeletal muscle assessment:***

Tissue was obtained from the left hind leg and homogenized in RIPA buffer with a polytron. Twenty  $\mu\text{g}$  of protein were loaded in PAGE-SDS gel, transferred in a nitrocellulose membrane, blocked with Non-fat dry milk 5% and incubated with primary antibody GLUT4 (Genetex, GTX33221, 1:5000 dilution) IRS1 (Genetex, GTX78916, 1:5000 dilution), IRS2 (Genetex, GTX57160, 1:5000 dilution) and beta-actin (Santacruz Biotechnology, sc-8432, 1:1000 dilution) overnight. ECL Plus Western Blotting was used to transfer chemiluminescence.

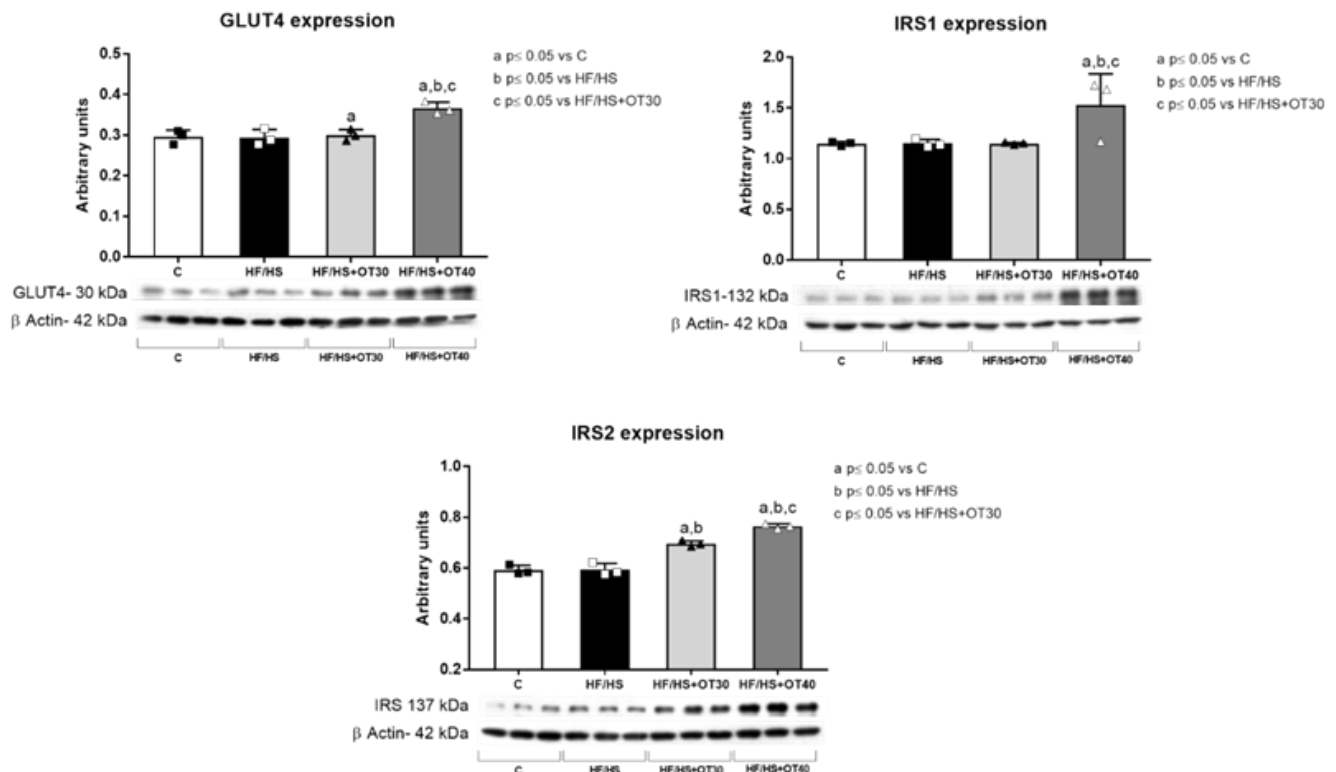

**Figure S1: Expression of GLUT4, insulin receptor substrate (IRS) 1 (IRS1), and IRS2 in soleus muscle.** For western blotting, three randomly selected samples per group were analyzed. Results are presented as mean  $\pm$  SD and analyzed by one-way ANOVA. Statistical significance was established as a=  $p < 0.05$  vs C, b=  $p < 0.05$  vs AD, c=  $p < 0.05$  vs OT30. Post hoc analysis was performed using the Bonferroni test.

### Liver assessment:

Tissue was obtained from the right lobe and homogenized in RIPA buffer with a polytron. Twenty  $\mu\text{g}$  of protein were loaded in PAGE-SDS gel, transferred in a nitrocellulose membrane, blocked with Non-fat dry milk 5%, and incubated with primary antibody KHK (Genetex, GTX109591, 1:10,000 dilution) and beta-actin (Santacruz Biotechnology, sc-8432, 1:1000 dilution) overnight. ECL Plus Western Blotting was used to transfer chemiluminescence.

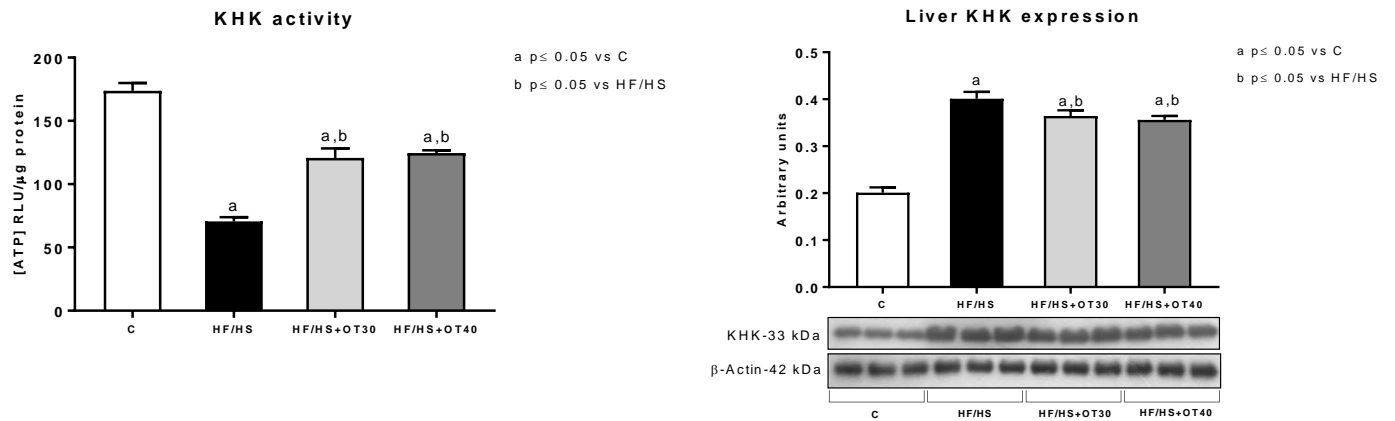

**Figure. S2. Fructokinase assessment in liver tissue.** Hepatic KHK activity and KHK expression. For western blotting, three randomly selected samples per group were analyzed. Results are presented as mean  $\pm$  SD and analyzed by one-way ANOVA. Statistical significance was established as **a**=  $p < 0.05$  vs C, **b**=  $p < 0.05$  vs AD. Post hoc analysis was performed using the Bonferroni test.
